# Supplementary material
Source: HighWire-hosted journal article supplement (https://erj.ersjournals.com/content/59/4/2101153)

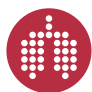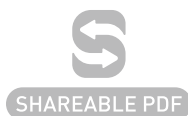

# Myeloid-cell-specific deletion of inducible nitric oxide synthase protects against smoke-induced pulmonary hypertension in mice

Marija Gredic<sup>1</sup>, Cheng-Yu Wu<sup>1</sup>, Stefan Hadzic<sup>1</sup>, Oleg Pak<sup>1</sup>, Rajkumar Savai<sup>1,2</sup>, Baktybek Kojonazarov<sup>1,3</sup>, Siddhartha Doswada<sup>1</sup>, Astrid Weiss<sup>1</sup>, Andreas Weigert<sup>4</sup>, Andreas Guenther<sup>1,5,6</sup>, Ralf P. Brandes<sup>7,8</sup>, Ralph T. Schermuly<sup>1</sup>, Friedrich Grimminger<sup>1</sup>, Werner Seeger<sup>1,2</sup>, Natascha Sommer<sup>1</sup>, Simone Kraut<sup>1</sup> and Norbert Weissmann<sup>1</sup>

<sup>1</sup>Cardio-Pulmonary Institute (CPI), Universities of Giessen and Marburg Lung Center (UGMLC), Member of the German Center for Lung Research (DZL), Justus-Liebig-University, Giessen, Germany. <sup>2</sup>Max Planck Institute for Heart and Lung Research, Member of the German Center for Lung Research (DZL), Bad Nauheim, Germany. <sup>3</sup>Institute for Lung Health (ILH), Justus-Liebig-University, Giessen, Germany. <sup>4</sup>Institute of Biochemistry I, Faculty of Medicine, Goethe-University Frankfurt, Frankfurt, Germany. <sup>5</sup>European IPF Registry & Biobank (eurlPFreg), Giessen, Germany. <sup>6</sup>Agaplesion Evangelisches Krankenhaus Mittelhessen, Giessen, Germany. <sup>7</sup>Institute for Cardiovascular Physiology, Faculty of Medicine, Goethe-University Frankfurt, Frankfurt, Germany. <sup>8</sup>DZHK – German Center for Cardiovascular Research, Partner site Rhine-Main, Germany.

Corresponding author: Norbert Weissmann ([norbert.weissmann@innere.med.uni-giessen.de](mailto:norbert.weissmann@innere.med.uni-giessen.de))

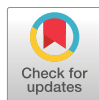

Shareable abstract (@ERSpublications)

**Deletion of iNOS in myeloid cells protects mice against smoke-induced PH. Cross-talk of M2 macrophages with PSMCs drives smoke-induced pulmonary vascular remodelling and depends on iNOS expression in macrophages and ERK activity in PSMCs.** <https://bit.ly/3itDtuV>

**Cite this article as:** Gredic M, Wu C-Y, Hadzic S, *et al.* Myeloid-cell-specific deletion of inducible nitric oxide synthase protects against smoke-induced pulmonary hypertension in mice. *Eur Respir J* 2022; 59: 2101153 [DOI: 10.1183/13993003.01153-2021].

This single-page version can be shared freely online.

Copyright ©The authors 2022.

This version is distributed under the terms of the Creative Commons Attribution Non-Commercial Licence 4.0. For commercial reproduction rights and permissions contact [permissions@ersnet.org](mailto:permissions@ersnet.org)

Received: 19 March 2020

Accepted: 3 Aug 2021

## Abstract

**Background** Pulmonary hypertension (PH) is a common complication of COPD, associated with increased mortality and morbidity. Intriguingly, pulmonary vascular alterations have been suggested to drive emphysema development. Previously, we identified inducible nitric oxide synthase (iNOS) as an essential enzyme for development and reversal of smoke-induced PH and emphysema, and showed that iNOS expression in bone-marrow-derived cells drives pulmonary vascular remodelling, but not parenchymal destruction. In this study, we aimed to identify the iNOS-expressing cell type driving smoke-induced PH and to decipher pro-proliferative pathways involved.

**Methods** To address this question we used 1) myeloid-cell-specific iNOS knockout mice in chronic smoke exposure and 2) co-cultures of macrophages and pulmonary artery smooth muscle cells (PASMCs) to decipher underlying signalling pathways.

**Results** Myeloid-cell-specific iNOS knockout prevented smoke-induced PH but not emphysema in mice. Moreover, iNOS deletion in myeloid cells ameliorated the increase in expression of CD206, a marker of M2 polarisation, on interstitial macrophages. Importantly, the observed effects on lung macrophages were hypoxia-independent, as these mice developed hypoxia-induced PH. *In vitro*, smoke-induced PASMC proliferation in co-cultures with M2-polarised macrophages could be abolished by iNOS deletion in phagocytic cells, as well as by extracellular signal-regulated kinase inhibition in PASMCs. Crucially, CD206-positive and iNOS-positive macrophages accumulated in proximity of remodelled vessels in the lungs of COPD patients, as shown by immunohistochemistry.

**Conclusion** In summary, our results demonstrate that iNOS deletion in myeloid cells confers protection against PH in smoke-exposed mice and provide evidence for an iNOS-dependent communication between M2-like macrophages and PASMCs in underlying pulmonary vascular remodelling.

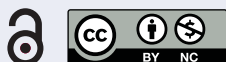

Supplement: inline-supplementary-material-2 [file inline-supplementary-material-2.pdf]
